# Supplementary material
Source: publisher figshare collection journal article supplement (https://future-science-group.figshare.com/ndownloader/files/29025369)
Supplement: Supplementary file 1 [file 29025369]

**Supplementary tables**

**Table S1 Bacterial** **species and strains used for six genus-specific primer pairs designa**

| **Genera** | **Species** |
| --- | --- |
| *Bacteroides* | *Bacteroides acidifaciens*, *Bacteroides caccae*, *Bacteroides caecicola* , *Bacteroides caecigallinarum*, *Bacteroides cellulosilyticus*, *Bacteroides cellulosolvens*, *Bacteroides coagulans*, *Bacteroides coprocola*, *Bacteroides coprophilus*, *Bacteroides coprosuis*, *Bacteroides dorei*, *Bacteroides eggerthii*, *Bacteroides faecis*, *Bacteroides finegoldii*, *Bacteroides fluxus*, *Bacteroides fragilis*, *Bacteroides gallinaceum*, *Bacteroides gallinarum*, *Bacteroides goldsteinii*, *Bacteroides gracilis*, *Bacteroides graminisolvens*,  *Bacteroides intestinalis*, *Bacteroides luti*, *Bacteroides massiliensis*, *Bacteroides nordii*, *Bacteroides oleiciplenus*, *Bacteroides oris*, *Bacteroides ovatus*, *Bacteroides paurosaccharolyticus*, *Bacteroides pectinophilus*, *Bacteroides plebeius*, *Bacteroides propionicifaciens*, *Bacteroides putredinis*, *Bacteroides pyogenes*, *Bacteroides reticulotermitis*, *Bacteroides rodentium*, *Bacteroides salanitronis*, *Bacteroides salyersiae*, *Bacteroides sartorii*, *Bacteroides splanchnicus*, *Bacteroides stercoris*, *Bacteroides suis*, *Bacteroides tectus*, *Bacteroides uniformis*, *Bacteroides vulgatus*, *Bacteroides xylanisolvens* |
| *Prevotella* | *Prevotella albensis*, *Prevotella amnii*, *Prevotella bergensis*, *Prevotella bivia*, *Prevotella brevis*, *Prevotella bryantii*, *Prevotella buccae*, *Prevotella buccalis*, *Prevotella copri,* *Prevotella dentalis*, *Prevotella denticola*, *Prevotella disiens*, *Prevotella enoeca*, *Prevotella heparinolytica*, *Prevotella histicola*, *Prevotella intermedia*, *Prevotella maculosa,* *Prevotella marshii*, *Prevotella melaninogenica,* *Prevotella micans*, *Prevotella multiformis*, *Prevotella nigrescens,* *Prevotella oralis*, *Prevotella oris*, *Prevotella oulorum*, *Prevotella pallens*, *Prevotella salivae*, *Prevotella stercorea*, *Prevotella tannerae*, *Prevotella timonensis*, *Prevotella veroralis*, *Prevotella zoogleoformans* |
| *Lactobacillus* | *Lactobacillus acetotolerans*, *Lactobacillus acidifarinae*, *Lactobacillus acidipiscis*, *Lactobacillus acidophilus*, *Lactobacillus agilis*, *Lactobacillus alimentarius*, *Lactobacillus casei*, *Lactobacillus crispatus*, *Lactobacillus delbrueckii*, *Lactobacillus fermentum*, *Lactobacillus gasseri*, *Lactobacillus helveticus*, *Lactobacillus johnsonii*, *Lactobacillus mucosae*, *Lactobacillus paracasei*, *Lactobacillus plantarum*, *Lactobacillus rhamnosus*, *Lactobacillus salivarius* |
| *Pediococcus* | *Pediococcus acidilactici*, *Pediococcus claussenii*, *Pediococcus dextrinicus*, *Pediococcus inopinatus*, *Pediococcus parvulus*, *Pediococcus pentosaceus*, *Pediococcus stilesii* |
| *Enterococcus* | *Enterococcus avium*, *Enterococcus faecalis*, *Enterococcus faecium*, *Enterococcus gilvus*, *Enterococcus hawaiiensis*, *Enterococcus pallens*, *Enterococcus pseudoavium*, *Enterococcus rotai*, *Enterococcus saccharolyticus*, *Enterococcus sanguinicola*, *Enterococcus sulfureus* |
| *Streptococcus* | *Streptococcus agalactiae*, *Streptococcus anginosus,* *Streptococcus constellatus*, *Streptococcus infantarius*, *Streptococcus lutetiensis*, *Streptococcus milleri*, *Streptococcus salivarius*, *Streptococcus thermophilus*, *Streptococcus vestibularis* |
| *Leuconostoc* | *Leuconostoc durionis*, *Leuconostoc fallax*, *Leuconostoc gasicomitatum*, *Leuconostoc gelidum*, *Leuconostoc inhae*, *Leuconostoc kimchi*, *Leuconostoc lactis*, *Leuconostoc mesenteroides*, *Leuconostoc pseudomesenteroides* |
| *Clostridium* | *Clostridioides difficile*, *Clostridium absonum*, *Clostridium aceticum*, *Clostridium acetireducens*, *Clostridium acetobutylicum*, *Clostridium acidisoli*, *Clostridium aciditolerans*, *Clostridium acidurici,* *Clostridium aerotolerans*, *Clostridium aestuarii*, *Clostridium akagii*, *Clostridium aldenense*, *Clostridium aldrichii*, *Clostridium algidixylanolyticum*, *Clostridium algifaecis*, *Clostridium algoriphilum*, *Clostridium alkalicellulosi,* *Clostridium aminophilum,* *Clostridium aminovalericum*, *Clostridium amygdalinum*, *Clostridium amylolyticum*, *Clostridium arbusti*, *Clostridium argentinense*, *Clostridium asparagiforme*, *Clostridium aurantibutyricum*, *Clostridium autoethanogenum*, *Clostridium baratii*, *Clostridium barkeri*, *Clostridium bartlettii*, *Clostridium beijerinckii*, *Clostridium bifermentans*, *Clostridium bolteae*, *Clostridium bornimense*, *Clostridium botulinum*, *Clostridium bowmanii*, *Clostridium bryantii*, *Clostridium butyricum*, *Clostridium cadaveris*, *Clostridium caenicola*, *Clostridium caminithermale*, *Clostridium carboxidivorans*, *Clostridium carnis*, *Clostridium cavendishii*, *Clostridium celatum*, *Clostridium celerecrescens*, *Clostridium cellobioparum*, *Clostridium cellulolyticum*, *Clostridium cellulosi*, *Clostridium cellulovorans*, *Clostridium chartatabidum,* *Clostridium clostridioforme*, *Clostridium coccoides*, *Clostridium herbivorans*, *Clostridium hylemonae*, *Clostridium indolis*, *Clostridium jejuense*, *Clostridium leptum,* *Clostridium methylpentosum*, *Clostridium oroticum*, *Clostridium populeti*, *Clostridium ramosum*, *Clostridium saccharolyticum*, *Clostridium scindens*, *Clostridium sphenoides*, *Clostridium sporosphaeroides*, *Clostridium symbiosum*, *Clostridium xylanolyticum*, *Clostridium xylanovorans* |
| *Eubacterium* | *Eubacterium cellulosolvens*, *Eubacterium contortum*, *Eubacterium eligens*, *Eubacterium rectalew*, *Eubacterium xylanophilum* |
| *Ruminococcus* | *Ruminococcus albus*, *Ruminococcus bromii*, *Ruminococcus callidus*, *Ruminococcus gnavus*, *Ruminococcus hansenii*, *Ruminococcus luti,* *Ruminococcus schinkii*, *Ruminococcus torques* |
| *Bifidobacterium* | *Bifidobacterium adolescent*, *Bifidobacterium angulatum*, *Bifidobacterium animalis*, *Bifidobacterium asteroids*, *Bifidobacterium bifidum*, *Bifidobacterium boum*, *Bifidobacterium breve*, *Bifidobacterium catenulatum*, *Bifidobacterium choerinum*, *Bifidobacterium coryneforme*, *Bifidobacterium cuniculi*, *Bifidobacterium dentium*, *Bifidobacterium gallicum*, *Bifidobacterium gallinarum*, *Bifidobacterium indicum*, *Bifidobacterium infantis*, *Bifidobacterium inopinatum*, *Bifidobacterium longum*, *Bifidobacterium magnum*, *Bifidobacterium merycicum*, *Bifidobacterium minimum*, *Bifidobacterium pseudocatenulatum*, *Bifidobacterium pseudolongum*, *Bifidobacterium psychraerophilum*, *Bifidobacterium pullorum*, *Bifidobacterium ruminantium*, *Bifidobacterium saeculare*, *Bifidobacterium scardovii*, *Bifidobacterium subtile*, *Bifidobacterium thermacidophilum*, *Bifidobacterium thermophilum*, *Bifidobacterium tsurumiense* |
| **Species** | **Strains** |
| *E. coli* | *E. coli* 0127:H6 E2348/69, *E. coli* 042, *E. coli* 536, *E. coli* 55989, *E. coli* ABU 83972, *E. coli* APEC 01, *E. coli* APEC 078, *E. coli* ATCC 8739, *E. coli* B str. REL606, *E. coli* BL21(DE3), *E. coli* BW2952, *E. coli* CFT073, *E. coli* DH1, *E. coli* E24377A, *E. coli* ETEC H10407, *E. coli* HS, *E. coli* IHE3034, *E. coli* JJ1886, *E. coli* NA114, *E. coli* PMV-1, *E. coli* UM146, *E. coli* 13A, *E. coli* CCFM8331, *E. coli* RCB249, |
| *Klebsiella pneumoniae* | *Klebsiella pneumoniae strain* BCH1, *Klebsiella pneumoniae strain* CCFM8357, *Klebsiella pneumoniae strain* M.pstv.16.1 |

a16S rRNA sequences of above species or strains covering *Bacteroides*, *Lactobacillus*, *Pediococcus*, *Enterococcus*, *Streptococcus*, *Bifidobacterium, Prevotella*, *Clostridium*, *Eubacterium, Ruminococcus, Leuconostoc*, *E. coli* and *Klebsiella pneumoniae* were retrieved from the NCBI GenBank database, and aligned to determine the regions designed for primers. The bacteria in the same box were closely related.

**Table S2** Level of similarity for 16S rRNA gene of 13 bacteria

| Bacteria | Similarity (%) | | | | | | | | | | | | |
| --- | --- | --- | --- | --- | --- | --- | --- | --- | --- | --- | --- | --- | --- |
| *Bacteroides* | *Lactobacillus* | *Pediococcus* | *Enterococcus* | *Streptococcus* | *Bifidobacterium* | *Prevotella* | *Clostridium* | *Eubacterium* | *Ruminococcus* | *Leuconostoc* | *E.coli* | *Klebsiella pneumoniae* |
| *Bacteroides* | 90.63 | 78.06 | 81.89 | 82.59 | 78.20 | 80.20 | 82.84 | 77.34 | 84.12 | 74.72 | 81.57 | 80.72 | 82.09 |
| *Lactobacillus* |  | 86.54 | 87.10 | 86.42 | 85.21 | 79.29 | 76.29 | 79.60 | 83.41 | 76.28 | 84.44 | 80.26 | 83.34 |
| *Pediococcus* |  |  | 92.53 | 89.87 | 85.66 | 82.89 | 79.35 | 81.87 | 84.73 | 76.90 | 86.78 | 81.06 | 86.88 |
| *Enterococcus* |  |  |  | 95.76 | 88.27 | 82.52 | 79.44 | 81.53 | 88.18 | 77.38 | 87.61 | 81.85 | 88.06 |
| *Streptococcus* |  |  |  |  | 87.87 | 84.93 | 79.01 | 80.38 | 83.09 | 75.71 | 84.34 | 80.72 | 83.96 |
| *Bifidobacterium* |  |  |  |  |  | 87.86 | 76.06 | 78.35 | 83.75 | 76.58 | 82.38 | 81.90 | 82.30 |
| *Prevotella* |  |  |  |  |  |  | 83.97 | 81.87 | 80.37 | 74.15 | 79.22 | 78.08 | 80.41 |
| *Clostridium* |  |  |  |  |  |  |  | 83.83 | 83.52 | 78.92 | 81.37 | 78.57 | 80.17 |
| *Eubacterium* |  |  |  |  |  |  |  |  | 89.95 | 76.89 | 84.83 | 82.52 | 84.43 |
| *Ruminococcus* |  |  |  |  |  |  |  |  |  | 78.44 | 76.62 | 74.95 | 76.80 |
| *Leuconostoc* |  |  |  |  |  |  |  |  |  |  | 91.58 | 81.26 | 87.05 |
| *E. coli* |  |  |  |  |  |  |  |  |  |  |  | 89.85 | 89.09 |
| *Klebsiella pneumoniae* |  |  |  |  |  |  |  |  |  |  |  |  | 98.92 |

**Table** **S3** Comparison between available primers and novel primers designed in this study

| **Genera or species** | **Primer sequence (5’-3’)** | **Size of PCR product (bp)** | **Tm (℃)** | **Amplification efficiency (100%)** | **Reference** |
| --- | --- | --- | --- | --- | --- |
| ***Bacteroides*** | F: AAGACAACGATGGATAGGGGTT  R: TTCACGCTACTTGGCTGGT | 132 | 55.7 | 107.778 | This study |
| *Bacteroides* & *Prevotella* | F: CCT WCGATGGATAGGGGTT  R: CACGCTACTTGGCTGGTTCAG  Probe: VIC-AAGGTCCCCCACATTG |  | 60 |  | [1] |
| *Bacteroides* & *Porphyromonas* & *Prevotella* | F: CACGAAGAACTCCGATTG  R: CACTTAAGCCGACACCT | 385 | 55 |  | [2] |
| Lactobacillaceae | F: ACAATGGACGCAAGTCTGATG  R: ACCGCTACACATGGAGTTCCACWGT | 322 | 55.7 | 104.863 | This study |
| *Lactobacillus* | F: GAGGCAGCAGTAGGGAATCTTC  R: GGCCAGTTACTACCTCTATCCTTCTTC  Probe: ATGGAGCAACGCCGC | 126 | 60 | 95 | [3] |
| *Lactobacillus* & *Leuconostoc* & *Pediococcus* | F: AGC AGTAGG GAA TCT TCC A  R: CGCCACTGGTGTTCYTCCATATA |  | 60 |  | [1] |
| *E. coil* | F: GAACGGTAACAGGAAGCAG  R: ATGAACAAAGGTATTAACTTTACT | 416 | 55.7 | 92.010 | This study |
| *E. coli* & *Shigella spp.* | F: GCATCGTGACCACCTTGA  R: CAGCGTGGTGGCAAAA | 59 | 56 | 98.1 | [4] |
| *E. coli* | F: CATGCCGCGTGTATGAAGAA  R: CGGGTAACGTCAATGAGCAAA |  | 60 |  | [1] |
| *Enterococcus* | F: CTTTCGGGTGTCGCTGAT  R: AGACTTTCGTCCATTGCC | 180 | 55.7 | 91.687 | This study |
| *Enterococcus faecalis* | F: AACCTACCCATCAGAGGG  R: GACGTTCAGTTACTAACG | 360 | 57 |  | [2] |
| *Enterococcus* | F: CCCTTATTGTTAGTTGCCATCATT  R: ACTCGTTGTACTTCCCATTGT |  | 60 |  | [1] |
| *Enterococcus* | F: ATCAGAGGGGGATAACACTT  R: ACTCTCATCCTTGTTCTTCTC | 336 | 55 |  | [5] |
| *Streptococcus* | F: ACAAGATGGACCTGCGTT  R: TTACCGTCACTGTGTGAACTT | 267 | 55.7 | 88.582 | This study |
| *Streptococcu*s *salivarius* | F: TTATTTGAAAGGGGCAATTGCT  R: GTGAACTTTCCACTCTCACAC |  |  |  | [1] |
| *Streptococcus* | F: AGCTTAGAAGCAGCTATTCATTC  R: GGATACACCTTTCGGTCTCTC | 309 | 60 |  | [5] |
| *Bifidobacterium* | F: GTCCGGTGTGAAAGTCCATC  R: GTAACGGCCCAGAGACCT | 154 | 55.7 | 109.947 | This study |
| *Bifidobacterium* | F: CGCGTCYGGTGTGAAAG  R: CCCCACATCCAGCATCCA  Probe: AACAGGATTAGATACCC | 244 | 60 | 95 | [3] |
| *Bifidobacterium* | F: CGGGTGAGTAATGCGTGACC  R: TGATAGGACGCGACCCCA  Probe: 6FAM-CTCCTGGAAACGGGTG |  | 60 |  | [1] |
| *Bifidobacterium* | F: GGGTGGTAATGCCGGATG  R: TAAGCGATGGACTTTCACACC | 442 | 58 |  | [2] |

**Reference**

1. Furet JP, Firmesse O, Gourmelon M *et al*. Comparative assessment of human and farm animal faecal microbiota using real-time quantitative PCR*.* *FEMS Microbiol. Ecol.* 68(3), 351-362 (2009).

2. Hopkins MJ, Macfarlane GT, Furrie E, Fite A, Macfarlane S. Characterisation of intestinal bacteria in infant stools using real-time PCR and northern hybridisation analyses*.* *FEMS Microbiol. Ecol.* 54(1), 77-85 (2005).

3. Delroisse J-M, Boulvin A-L, Parmentier I, Dauphin RD, Vandenbol M, Portetelle D. Quantification of Bifidobacterium spp. and Lactobacillus spp. in rat fecal samples by real-time PCR*.* *Microbiological Research* 163(6), 663-670 (2008).

4. Clifford RJ, Milillo M, Prestwood J *et al*. Detection of bacterial 16S rRNA and identification of four clinically important bacteria by real-time PCR*.* *PLoS One* 7(11), e48558 (2012).

5. Kubota H, Tsuji H, Matsuda K, Kurakawa T, Asahara T, Nomoto K. Detection of human intestinal catalase-negative, Gram-positive cocci by rRNA-targeted reverse transcription-PCR*.* *Appl. Environ. Microbiol.* 76(16), 5440-5451 (2010).
